# Supplementary material for: Levulinic acid hydrogenation to γ-valerolactone over single Ru atoms on a TiO2@nitrogen doped carbon support
Source: Royal Society of Chemistry journal article supplement (doi:10.1039/d0gc04108d), 2021-01-01
Supplement: d0gc04108d1.pdf [file d0gc04108d1.pdf]

Supporting Information

**Levulinic Acid Hydrogenation to  $\gamma$ -Valerolactone over Single Ru Atoms on TiO<sub>2</sub>@Nitrogen Doped Carbon Support**

Kaili Zhang<sup>a</sup>, Qinglei Meng<sup>b</sup>, Haihong Wu<sup>a\*</sup>, Tongying Yuan<sup>a</sup>, Shitao Han<sup>a</sup>, Jianxin Zhai<sup>a</sup>,  
Bingxiao Zheng<sup>a</sup>, Caiyun Xu<sup>a</sup>, Wei Wu<sup>a</sup>, Mingyuan He<sup>a</sup>, Buxing Han<sup>a,b\*</sup>

<sup>a</sup> Shanghai Key Laboratory of Green Chemistry and Chemical Processes, School of Chemistry and Molecular Engineering, East China Normal University, Shanghai 200062, China

<sup>b</sup> Beijing National Laboratory for Molecular Sciences, CAS Key Laboratory of Colloid, Interface and Chemical Thermodynamics, CAS Research/Education Center for Excellence in Molecular Sciences, Institute of Chemistry, Chinese Academy of Sciences, Beijing 100190, China.

## 1. Experimental

### 1.1 Chemicals

The Tetra-*n*-butyl-titanate (TBOT)(98.0%, AR grade), *N,N*-Dimethylformamide (DMF)(99.5%, AR grade) were purchased from Sinopharm Chemical Reagent Co., Ltd. MeOH (>99.9%, HPLC grade) was obtained from Energy Chemical, 2-aminoterephthalic acid (99%, AR grade) was provided Alfa Aesar. RuCl<sub>3</sub> (99%, AR grade), **Terephthalic acid (99%, AR grade)** and **Titanium oxide (99%, AR grade)** were obtained from Beijing InnoChem Science & Technology Co., Ltd. H<sub>2</sub> and N<sub>2</sub> were purchased from Shanghai Chemical Industry Park Pujiang Special Gas Co., Ltd. All the chemicals were used as received without further purification.

### 1.2 Catalyst preparation

**Ru@NH<sub>2</sub>-MIL-125 (Ti)**: Tetra-*n*-butyl-titanate (1.4 g, 4 mmol), 2-aminoterephthalic acid (1.1 g, 6 mmol) and RuCl<sub>3</sub> (10.2 mg, 0.04 mmol) were dissolved in 100 mL of DMF/MeOH (V/V, 9/1). The mixture was stirred at room temperature for 2 h and was placed in an oil bath and heated to 393 K for 48 h. A yellow powder of Ru/NH<sub>2</sub>-MIL-125 (Ti) was isolated by centrifugation. Then the powder was washed three times with DMF and dried under vacuum at 373 K overnight.

**Ru@MIL-125 (Ti)**: **A gray powder of Ru@MIL-125 (Ti) was synthesized in accordance with the synthesis of Ru@NH<sub>2</sub>-MIL-125 (Ti), expect that the same molar amount of terephthalic acid was used instead of 2-aminoterephthalic acid.**

**Ru/TiO<sub>2</sub>@CN**: The powder of Ru/NH<sub>2</sub>-MIL-125 (Ti) was placed in a tube furnace and then heated to 973 K at a heating rate of 2 °C/min, and then kept for 2 h under a flowing nitrogen atmosphere. After cooling to room temperature, the black powder was collected for future use. **For comparison, the catalysts of Ru/TiO<sub>2</sub>@CN-500 and Ru/TiO<sub>2</sub>@CN-900 were prepared by the same procedures for preparing the Ru/TiO<sub>2</sub>@CN catalyst except the calcination temperature was 773K and 1173K.**

**Ru/TiO<sub>2</sub>@C**: The black powder of Ru/TiO<sub>2</sub>@C was obtained by calcining Ru@MIL-125 (Ti) powder, and the heating program was the same as synthesize Ru/TiO<sub>2</sub>@CN.

**TiO<sub>2</sub>@CN**: The black powder of TiO<sub>2</sub>@CN was synthesized following the same procedures to synthesize Ru/TiO<sub>2</sub>@CN, the main difference was that RuCl<sub>3</sub> was not added.

Ru(0.14wt%)/TiO<sub>2</sub>: Anatase TiO<sub>2</sub> (0.5 g) was added into 10 mL deionized water, RuCl<sub>3</sub> (1.77 mg) was dissolved in 10 mL deionized water. While stirring. The RuCl<sub>3</sub> aqueous solution was added dropwise to the titanium oxide suspension. After stirring for 24 h at room temperature, the excess water was evaporated at 60 °C under vacuum to collect the gray powder. The catalyst was reduced at 400 °C for 2 h in 10% H<sub>2</sub>/Ar flow.

### 1.3 Catalytic reaction

The hydrogenation of levulinic acid (LA) was carried out in a Teflon-lined stainless steel reactor of 16 mL with mechanical stirring at approximately 800 rpm. In a typical experiment, 10 mg of catalyst, 58 mg (0.5 mmol) LA and 1 mL of deionized water were added into the reactor. The reactor was purged with H<sub>2</sub> three times, and finally sealed at a H<sub>2</sub> pressure of 6 MPa. After suitable reaction time, the stirring was stopped. The liquid phase was separated from the catalyst by filtration through a Nylon membrane (Whatman, Φ13 mm×0.45 μm). The combined liquid mixture was then analyzed on a HPLC (Waters 2695) equipped with an Aminex HPX-87H column, with a UV/Visible detector (Waters 2489) and a Refractive Index Detector (Waters 2414), and the mobile phase was 5 mM sulfuric acid at a flow rate of 0.7 mL/min. Identification of the products were conducted on GC/MS (Agilent 7890B GC+ 5977A MSD).

In the recycle experiment, the catalyst was separated from solution by filtrate through a Nylon membrane (Φ50mm×0.2 μm). The catalyst was washed by ethanol several times, and then dried at 333 K overnight. The recovered catalyst was used for the next cycle.

### 1.4 Characterization

X-ray diffraction (XRD) patterns were collected on a Rigaku Ultima IV X-ray diffractometer using Cu K $\alpha$  radiation at 35 kV and 25 mA ( $\lambda = 1.5405 \text{ \AA}$ ) over a  $2\theta$  ranging from 5 °C to 90 °C at a scanning speed of 5°/min. The crystal morphology and size were determined by scanning electron microscopy (SEM) on a Hitachi S-4800 microscope and transmission electron microscopy (TEM) on a JEOL JEM-2100 microscope at an accelerating voltage of 200 kV. The high angle annular dark-field scanning TEM (HAADF-STEM) were operated at 300 kV by a JEOL Grand ARM 300F. The Ru and Ti contents were quantified by inductively coupled plasma emission spectrometer (ICP-OES) on an Optima 8300. X-ray photoelectron spectroscopy (XPS) was worked with Al $K_{\alpha}$  ( $h\nu = 1486.36 \text{ eV}$ ) radiation with a Thermo Scientific K-Alpha spectrometer. Nitrogen sorption isotherms were obtained at 77K by using a BEL-SORP-MAX instrument after degassing the samples for 8 h under vacuum at 473 K. The surface areas were calculated by the BET method. <sup>1</sup>H NMR spectroscopy was acquired on a Bruker Advance 500MHz spectrometer. Raman spectroscopy was collected by using Shimadzu LabRAM HR Evolution with laser excitation at 633 nm. Fourier Transform Infrared Spectra (FT-IR) was performed on a Thermo Scientific Nicolet NEXUS670 FT-IR microscope. XAFS spectra at the Ru K-edge ( 22117 eV) were measured at the beamline 1W1B station of Beijing Synchrotron Radiation Facility (BSRF, 2.5 GeV, 250 mA, monochromatized with Si(111) double-crystals). The resulting spectra were energy-calibrated, background corrected, and normalized at the height of the edge step using the Athena program from the iFeffit® software suite (B. Ravel, M. Newville, J. Synchrotron Radiat. 2005, 12, 537). Fourier transformations were performed from 3 to 14  $\text{\AA}^{-1}$ .

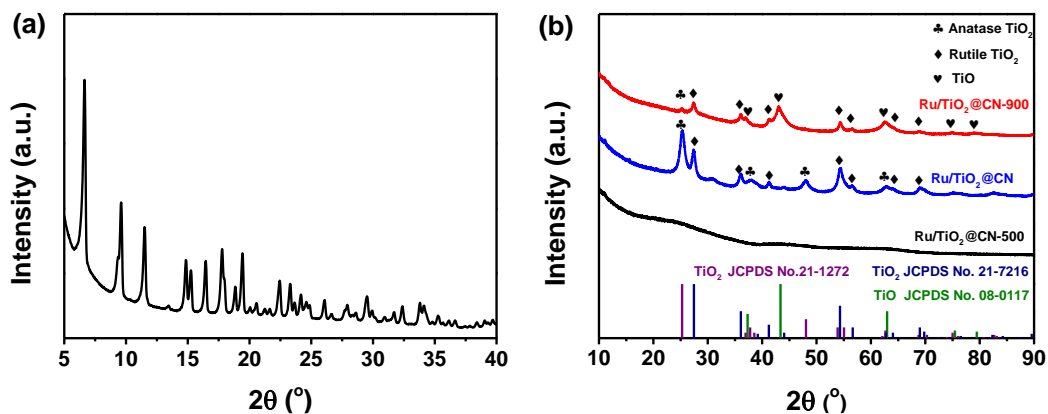

Figure S1. XRD pattern of (a) Ru/NH<sub>2</sub>-MIL-125(Ti) and (b) Ru/TiO<sub>2</sub>@CN-500 and Ru/TiO<sub>2</sub>@CN-900.

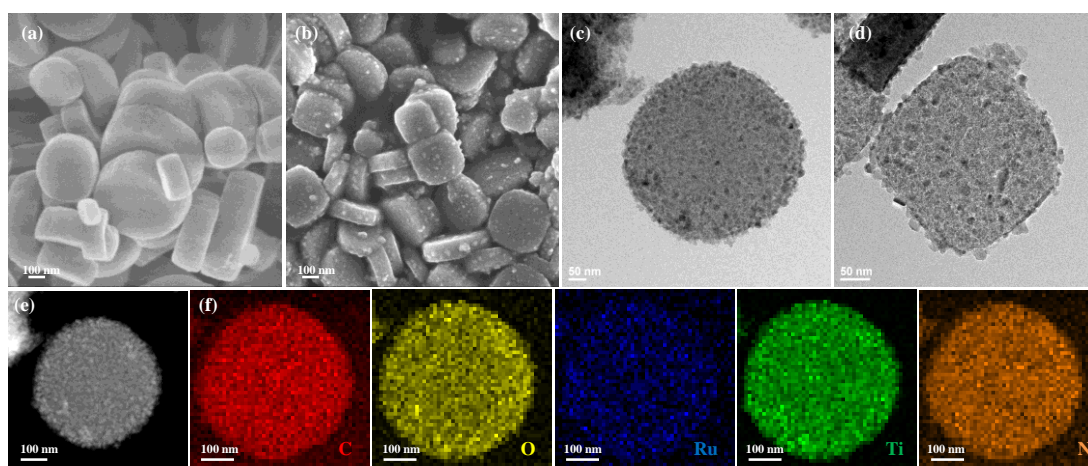

Figure S2. SEM and TEM images of the samples. SEM images of (a) Ru/NH<sub>2</sub>-MIL-125(Ti) and (b) TiO<sub>2</sub>@CN, TEM images of (c) Ru/TiO<sub>2</sub>@CN and (d) TiO<sub>2</sub>@CN. (e) HAADF-STEM and (f) elemental mapping results of Ru/TiO<sub>2</sub>@CN.

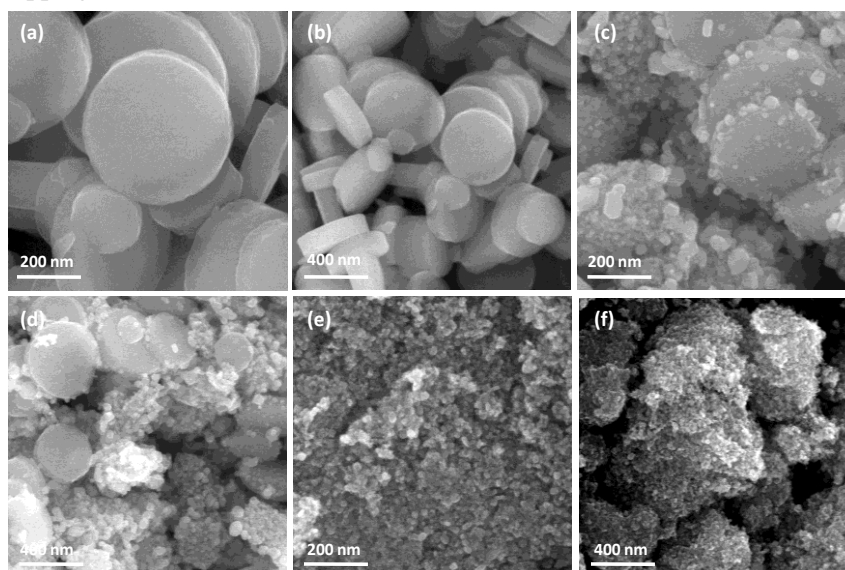

Figure S3. SEM images of (a and b) Ru/TiO<sub>2</sub>@CN-500, (c and d) Ru/TiO<sub>2</sub>@CN-900 and (e, f) Ru/TiO<sub>2</sub>@C.

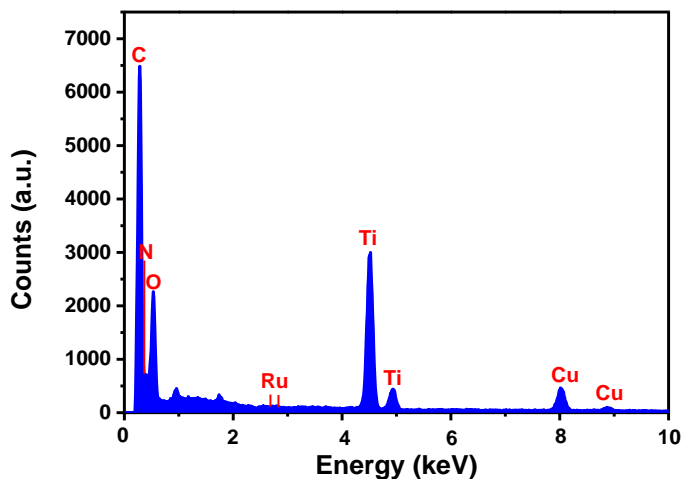

Figure S4. The EDX images of the Ru/TiO<sub>2</sub>@CN catalyst.

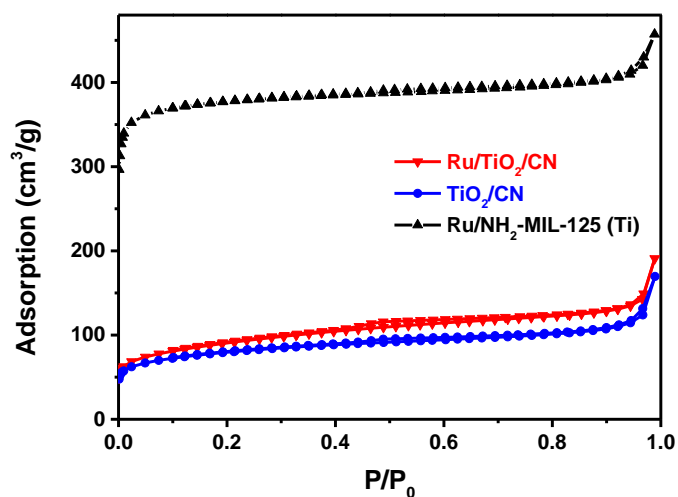

Figure S5. N<sub>2</sub> adsorption–desorption isotherms of different materials.

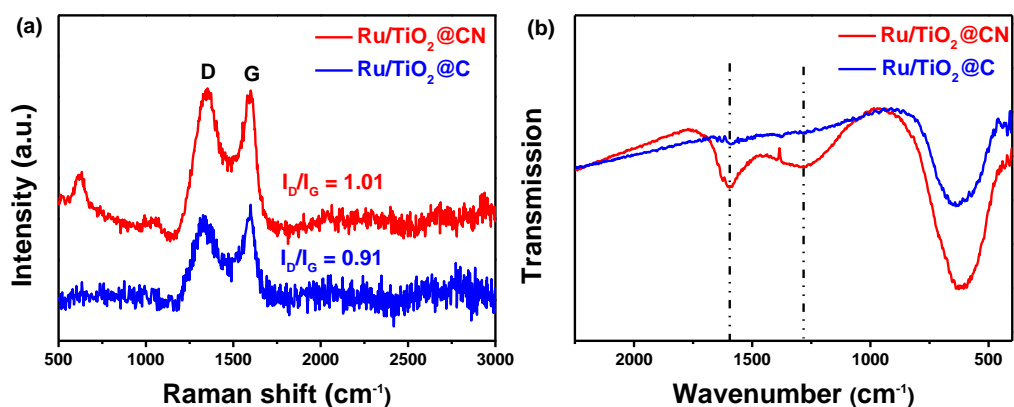

Figure S6. Raman spectra for Ru/TiO<sub>2</sub>@CN and Ru/TiO<sub>2</sub>@C. (b) FT-IR spectra of Ru/TiO<sub>2</sub>@CN and Ru/TiO<sub>2</sub>@C.

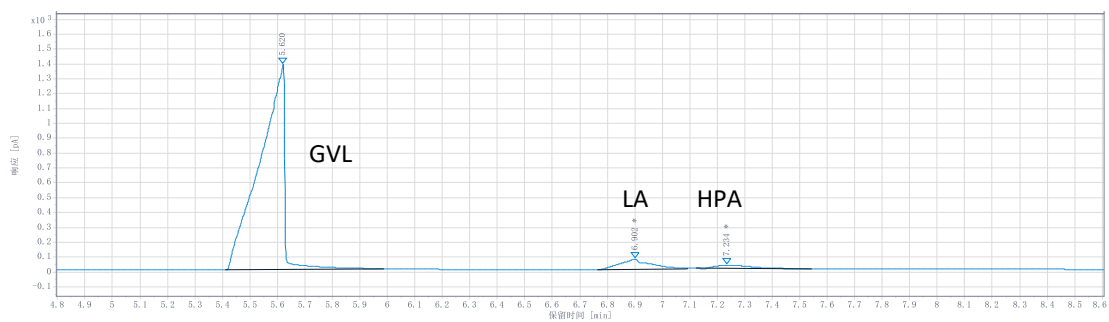

Figure S7. Gas chromatogram result of the transformation of LA at 10 h.  
Reaction conditions: LA (0.5 mmol), Ru/TiO<sub>2</sub>@CN (10 mg), D<sub>2</sub>O (1 mL), 30 °C, H<sub>2</sub> (6 MPa).

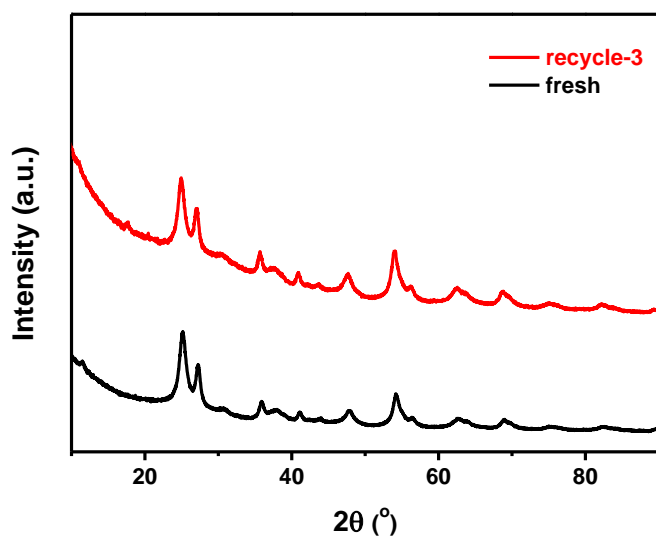

Figure S8. XRD patterns of fresh and reused (3 cycles) Ru/TiO<sub>2</sub>@CN.

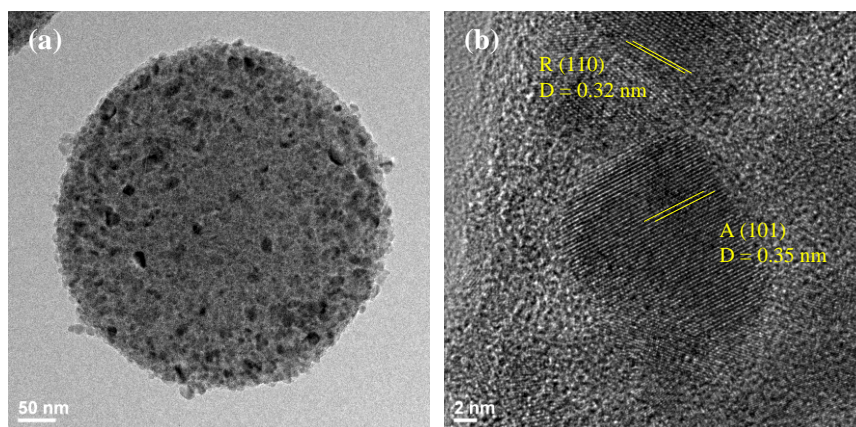

Figure S9. TEM images of (a, b) Ru/TiO<sub>2</sub>@CN after reused 3 cycles.

Table S1. EDX analysis of the Ru/TiO<sub>2</sub>@CN catalyst.

| Catalyst                | EDX analysis (wt%) |       |       |       |        |
|-------------------------|--------------------|-------|-------|-------|--------|
|                         | C (K)              | N (K) | O (K) | Ti(K) | Ru (K) |
| Ru/TiO <sub>2</sub> @CN | 62.55              | 6.15  | 11.83 | 18.8  | 0.83   |

Table S2. Summary of the results from N<sub>2</sub> adsorption - desorption.

| Entry | catalyst                        | S <sub>BET</sub> (m <sup>2</sup> g <sup>-1</sup> ) <sup>a</sup> | Micropore surface area <sup>b</sup> (m <sup>2</sup> g <sup>-1</sup> ) | External surface area <sup>b</sup> (m <sup>2</sup> g <sup>-1</sup> ) | Micropore volume <sup>b</sup> (cm <sup>3</sup> g <sup>-1</sup> ) |
|-------|---------------------------------|-----------------------------------------------------------------|-----------------------------------------------------------------------|----------------------------------------------------------------------|------------------------------------------------------------------|
| 1     | Ru/NH <sub>2</sub> -MIL-125(Ti) | 1316.1                                                          | 1234.9                                                                | 81.2                                                                 | 0.551                                                            |
| 2     | Ru/TiO <sub>2</sub> @CN         | 319.9                                                           | 167                                                                   | 153                                                                  | 0.075                                                            |
| 3     | TiO <sub>2</sub> @CN            | 281.5                                                           | 186                                                                   | 96                                                                   | 0.083                                                            |

<sup>a</sup>P/P<sub>0</sub> = 0.01-0.2.

<sup>b</sup>P/P<sub>0</sub> = 0.24-0.4, obtained by the t-plot method.

Table S3. ICP – OES analysis of different catalysts and used Ru/TiO<sub>2</sub>@CN catalysts.

| Entry | Catalyst                        | Ru (wt%) | Ti (wt%) |
|-------|---------------------------------|----------|----------|
| 1     | RuTiO <sub>2</sub> /CN          | 0.14     | 21       |
| 2     | RuTiO <sub>2</sub> /C           | 0.25     | 11       |
| 3     | RuTiO <sub>2</sub> /CN-500      | 0.13     | 20       |
| 4     | RuTiO <sub>2</sub> /CN-900      | 0.23     | 6        |
| 5     | Ru/TiO <sub>2</sub>             | 0.12     | 59       |
| 6     | RuTiO <sub>2</sub> /CN(1 cycle) | 0.14     | 19       |
